# Supplementary material
Source: PubMed Central journal article supplement (PMC2141825)

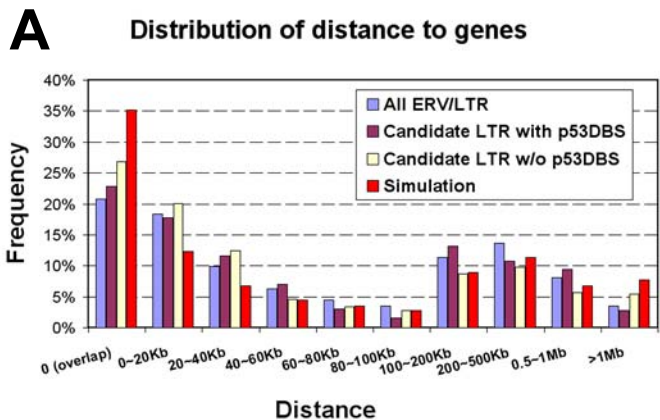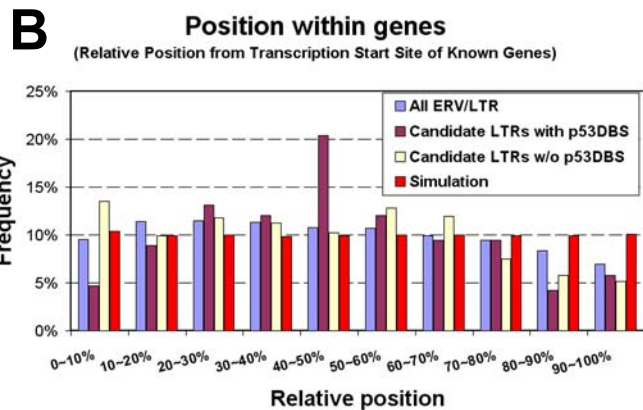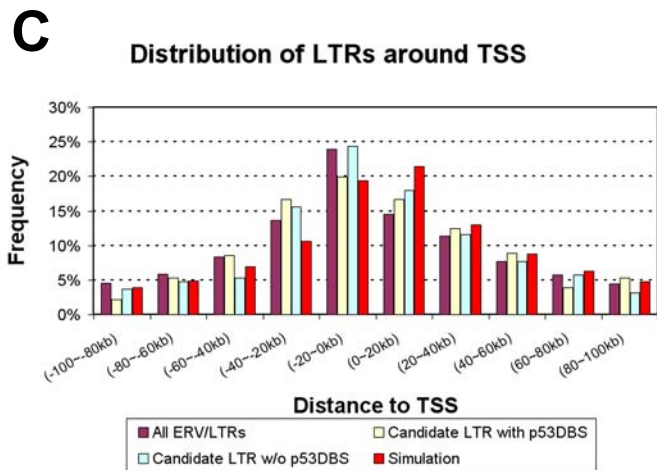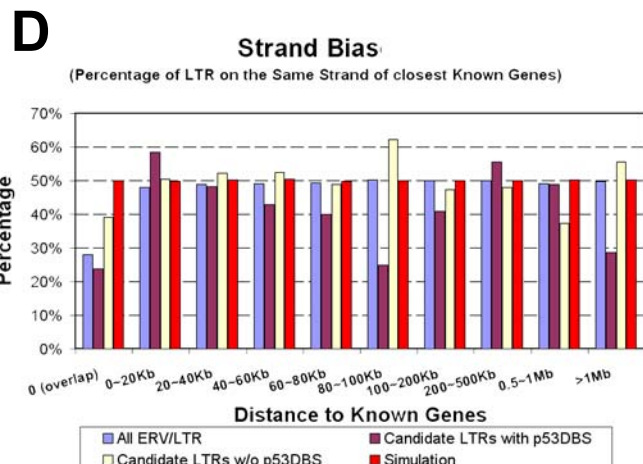

Supplement: pnas_0703637104_1.pdf [file pnas_0703637104_1.pdf]

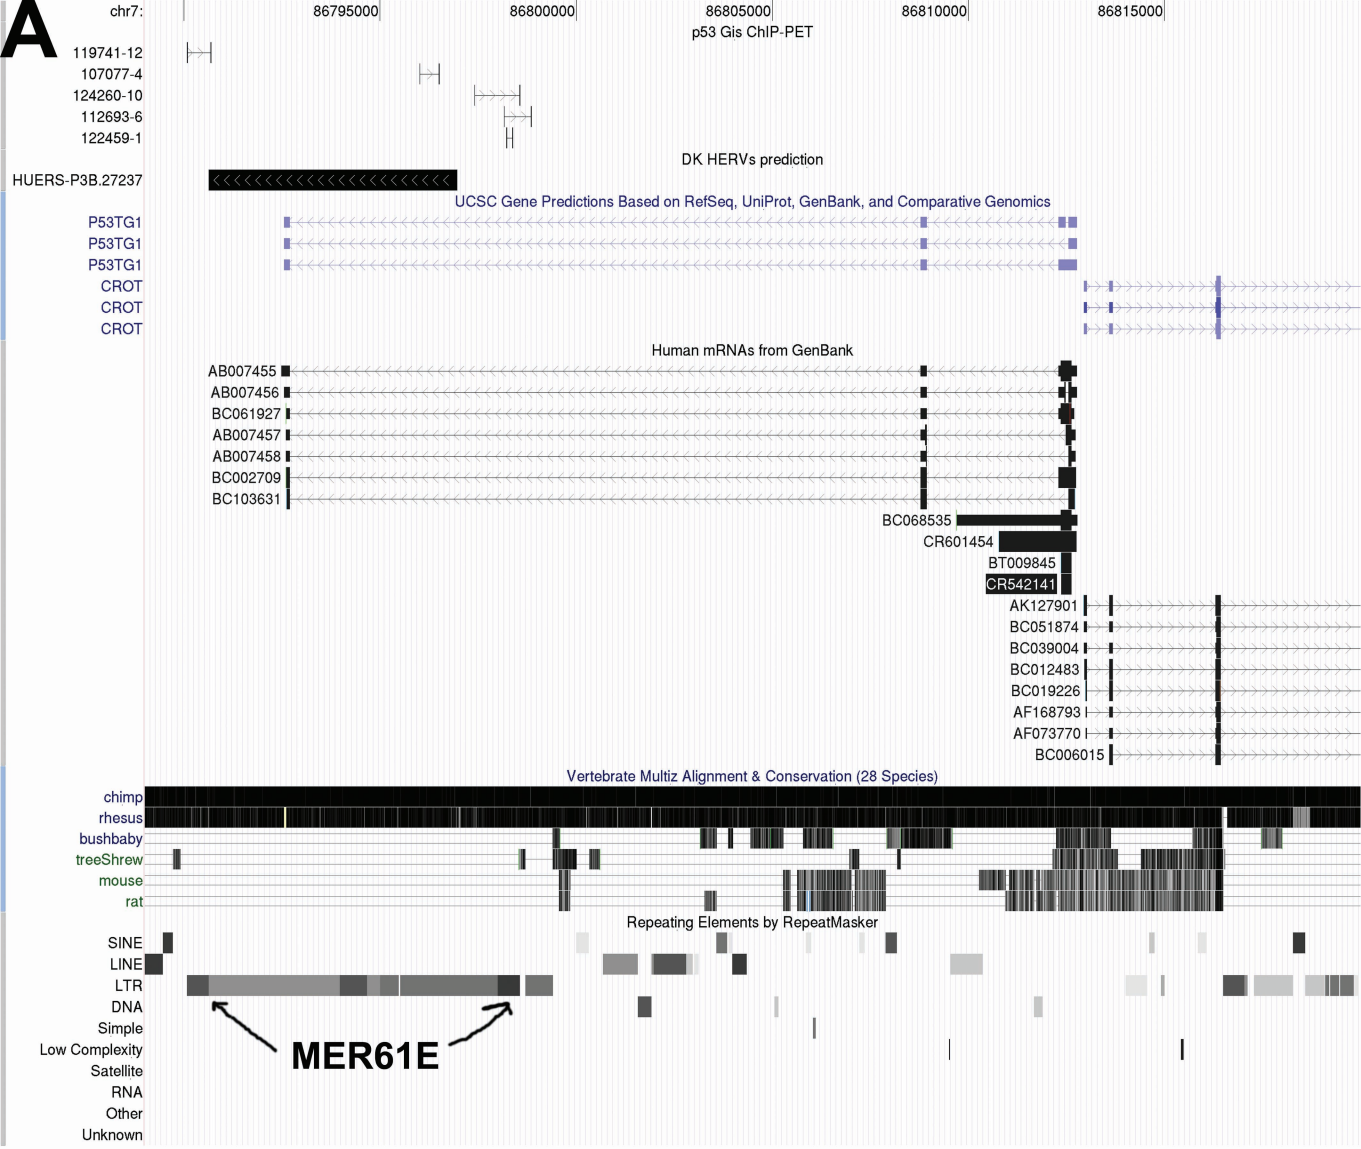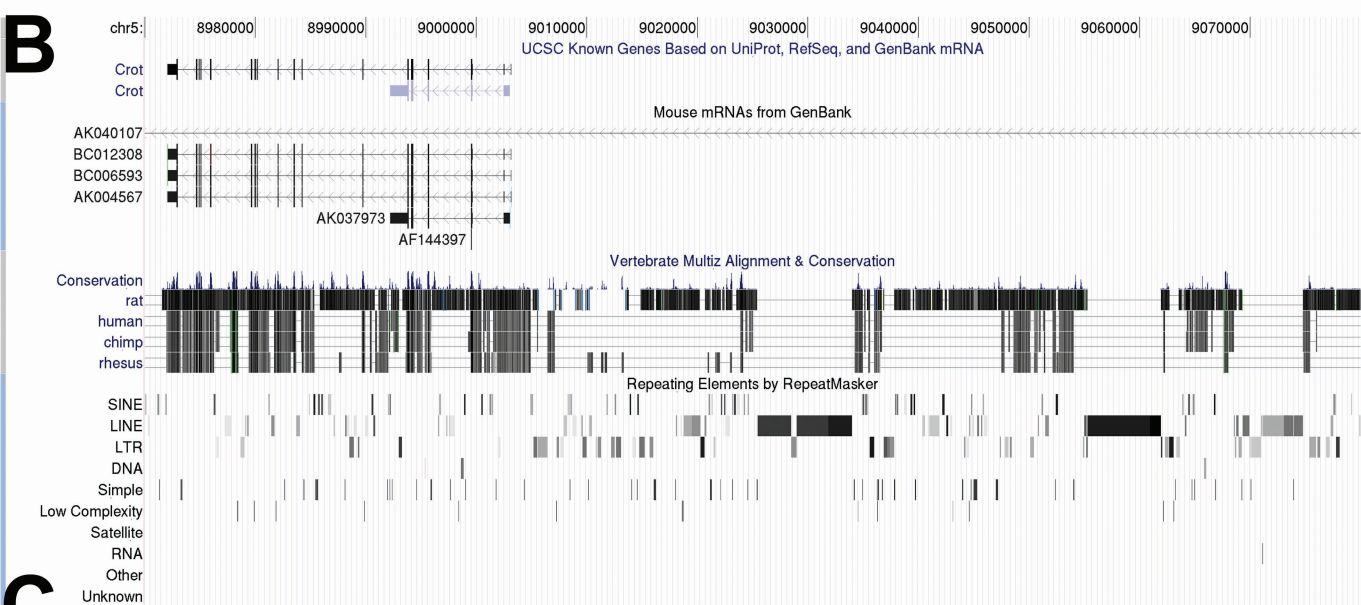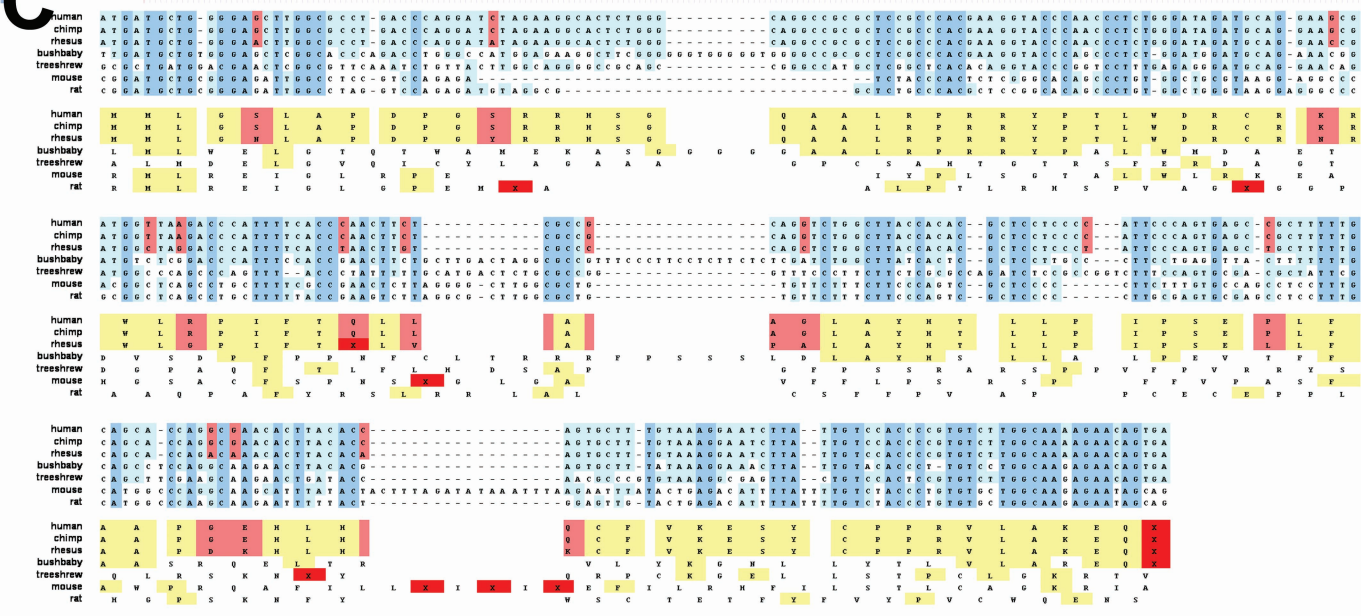

Supplement: pnas_0703637104_2.pdf [file pnas_0703637104_2.pdf]
